# Supplementary material
Source: MDPI journal article supplement (https://www.mdpi.com/2073-4441/16/2/330)
Supplement: s1 [file s1 › water-2785906-supplementary.pdf]

**Table S1.** Descriptive statistical variables for the number of lactating cows per season and production system, monitored for the animal drinking consumption.

| <b>Pasture System n = 60</b>        |    |         |        |      |        |       |      |
|-------------------------------------|----|---------|--------|------|--------|-------|------|
| Season                              | n  | Average | Median | SD   | CV (%) | Max.  | Min. |
| Wet season                          | 27 | 47.9    | 49.0   | 14.2 | 29.7   | 68.0  | 23.0 |
| Dry season                          | 33 | 45.6    | 48.0   | 15.3 | 33.6   | 68.0  | 22.0 |
| <b>Semi-Confined System n = 132</b> |    |         |        |      |        |       |      |
| Season                              | n  | Average | Median | SD   | CV (%) | Max.  | Min. |
| Wet season                          | 56 | 64.7    | 41.0   | 64.4 | 99.5   | 250.0 | 22.0 |
| Dry season                          | 76 | 80.8    | 41.0   | 75.8 | 93.8   | 266.0 | 20.0 |
| <b>Confined System n = 122</b>      |    |         |        |      |        |       |      |
| Season                              | n  | Average | Median | SD   | CV (%) | Max.  | Min. |
| Wet season                          | 54 | 78.6    | 70.0   | 42.0 | 53.5   | 195.0 | 28.0 |
| Dry season                          | 68 | 82.5    | 73.0   | 47.3 | 57.4   | 266.0 | 27.0 |

Notes: n- number of records/ SD- standard deviation / CV- coefficient of variation /Max. – Maximum / Min. - Minimum

**Table S2.** Descriptive statistical variables for the number of lactating cows per season and production system, monitored for cleaning consumption.

| <b>Pasture System n = 121</b>       |     |         |        |      |        |       |      |
|-------------------------------------|-----|---------|--------|------|--------|-------|------|
| Season                              | n   | Average | Median | SD   | CV (%) | Max.  | Min. |
| Wet season                          | 55  | 35.1    | 32.0   | 11.6 | 32.9   | 68.0  | 17.0 |
| Dry season                          | 66  | 39.2    | 36.5   | 15.1 | 38.5   | 74.0  | 20.0 |
| <b>Semi-Confined System n = 349</b> |     |         |        |      |        |       |      |
| Season                              | n   | Average | Median | SD   | CV (%) | Max.  | Min. |
| Wet season                          | 167 | 58.1    | 38.0   | 44.8 | 77.1   | 250.0 | 12.0 |
| Dry season                          | 182 | 65.9    | 40.0   | 56.6 | 85.9   | 250.0 | 15.0 |
| <b>Confined System n = 92</b>       |     |         |        |      |        |       |      |
| Season                              | n   | Average | Median | SD   | CV (%) | Max.  | Min. |
| Wet season                          | 42  | 83.7    | 78.0   | 52.7 | 62.9   | 286.0 | 26.0 |
| Dry season                          | 50  | 104.7   | 80.5   | 71.9 | 68.7   | 292.0 | 30.0 |

Notes: n- number of records/ SD- standard deviation / CV- coefficient of variation /Max. – Maximum / Min. - Minimum

**Table S3.** Descriptive statistical variables for kg milk cow day<sup>-1</sup>, per season and production system, monitored for the animal drinking consumption.

| Milk Yield – Pasture System       |    |         |        |     |        |      |      |
|-----------------------------------|----|---------|--------|-----|--------|------|------|
| Season                            | n  | Average | Median | SD  | CV (%) | Max. | Min. |
| Wet season                        | 27 | 18.2    | 18.2   | 2.2 | 12.2   | 23.0 | 13.7 |
| Dry season                        | 33 | 17.5    | 18.3   | 2.9 | 17.0   | 22.0 | 12.3 |
| Milk Yield – Semi-Confined System |    |         |        |     |        |      |      |
| Season                            | n  | Average | Median | SD  | CV (%) | Max. | Min. |
| Wet season                        | 56 | 15.6    | 15.3   | 3.4 | 21.8   | 22.1 | 10.1 |
| Dry season                        | 76 | 15.7    | 16.0   | 3.7 | 23.6   | 22.9 | 10.0 |
| Milk Yield – Confined System      |    |         |        |     |        |      |      |
| Season                            | n  | Average | Median | SD  | CV (%) | Max. | Min. |
| Wet season                        | 54 | 23.5    | 23.5   | 4.7 | 19.8   | 34.6 | 13.8 |
| Dry season                        | 68 | 24.4    | 25.5   | 5.6 | 22.8   | 34.5 | 11.0 |

Notes: n- number of records/ SD- standard deviation / CV- coefficient of variation /Max. – Maximum / Min. – Minimum

**Table S4.** Descriptive statistical variables for kg milk cow day<sup>-1</sup>, per season and production system, monitored for cleaning consumption.

| Milk Yield – Pasture System       |     |         |        |     |        |      |      |
|-----------------------------------|-----|---------|--------|-----|--------|------|------|
| Season                            | n   | Average | Median | SD  | CV (%) | Max. | Min. |
| Wet season                        | 55  | 13.8    | 13.48  | 2.5 | 18.1   | 20.5 | 10.1 |
| Dry season                        | 66  | 14.2    | 13.39  | 3.2 | 22.8   | 21.8 | 10.1 |
| Milk Yield – Semi-Confined System |     |         |        |     |        |      |      |
| Season                            | n   | Average | Median | SD  | CV (%) | Max. | Min. |
| Wet season                        | 167 | 15.5    | 15.6   | 3.9 | 25.6   | 27.2 | 10.1 |
| Dry season                        | 182 | 15.2    | 14.7   | 3.5 | 22.7   | 23.8 | 10.0 |
| Milk Yield – Confined System      |     |         |        |     |        |      |      |
| Season                            | n   | Average | Median | SD  | CV (%) | Max. | Min. |
| Wet season                        | 42  | 19.7    | 19.1   | 6.6 | 33.7   | 40.5 | 10.1 |
| Dry season                        | 50  | 22.8    | 19.9   | 7.1 | 30.9   | 38.6 | 12.8 |

Notes: n- number of records/ SD- standard deviation / CV- coefficient of variation /Max. – Maximum / Min. - Minimum
